# Supplementary material for: The pineapple MADS-box gene family and the evolution of early monocot flower
Source: PubMed Central journal article supplement (PMC7806820; doi:10.1038/s41598-020-79163-8), 2021-01-13
Supplement: 41598_2020_79163_MOESM1_ESM.pdf [file 41598_2020_79163_MOESM1_ESM.pdf]

## SUPPORTING INFORMATION

### **The pineapple MADS-box gene family and the evolution of early monocot flower**

Juan Hu<sup>1</sup>, Xiaojun Chang<sup>1</sup>, Ying Zhang<sup>1</sup>, Xianxian Yu<sup>2</sup>, Yuan Qin<sup>1</sup>, Yun Sun<sup>1</sup>, Liangsheng Zhang<sup>1, 3\*</sup>

<sup>1</sup>Fujian Provincial Key Laboratory of Haixia Applied Plant Systems Biology, College of Horticulture, Fujian Agriculture and Forestry University, Fuzhou 350002, China

<sup>2</sup>School of Urban-Rural Planning and Landscape Architecture, Xuchang University, Xuchang 461000, China

<sup>3</sup>Genomics and Genetic Engineering Laboratory of Ornamental Plants, College of Agriculture and Biotechnology, Zhejiang University, Hangzhou 310058, China.

\*Corresponding author:

Liangsheng Zhang, E-mail: zls83@zju.edu.cn

### **Running title: The pineapple MADS-box gene family**

## SUPPORTING INFORMATION

**Figure S1.** Phylogenetic relationships of type I MADS-box genes in pineapple (Ac), *Amborella* (Scaffold), waterlily (Nc), *Arabidopsis* (At), rice (Loc\_Os), and sorghum (Sobic).

**Figure S2.** Phylogenetic relationships of type II MADS-box genes in the 12 following species: pineapple (Ac), *Amborella* (Scaffold), waterlily (Nc), *Arabidopsis* (At), *Vitis vinifera* (Vt), rice (Loc\_Os), sorghum (Sobic), *P. equestris* (Peq), *M. acuminata* (Ma), *E. guineensis* (p5), *P. dactylifera* (PDK), and *S. polyrhiza* (Spipo).

**Table S1.** List of other pineapple MADS-box genes not included in Table 1.

**Table S2.** List of FPKM values of all MADS-box genes in flowers and roots, leaves, and different developmental stages of fruit (S1–S7).

**Table S3.** List of FPKM values of all MADS-box genes in five representative pineapple floral organs (sepals (S1-S4), petals (S1-S3), stamens (S1-S6), pistils (S1-S7), and ovules (S1-S7)) at different developmental stages.

**Table S4.** List of TPM value of ABCDE model genes in four representative pineapple floral parts (sepal (S1-S3), petal, stamen, pistil and ovule (S1-S3)) at different developmental stages.

**Table S5.** The primers used in this study.

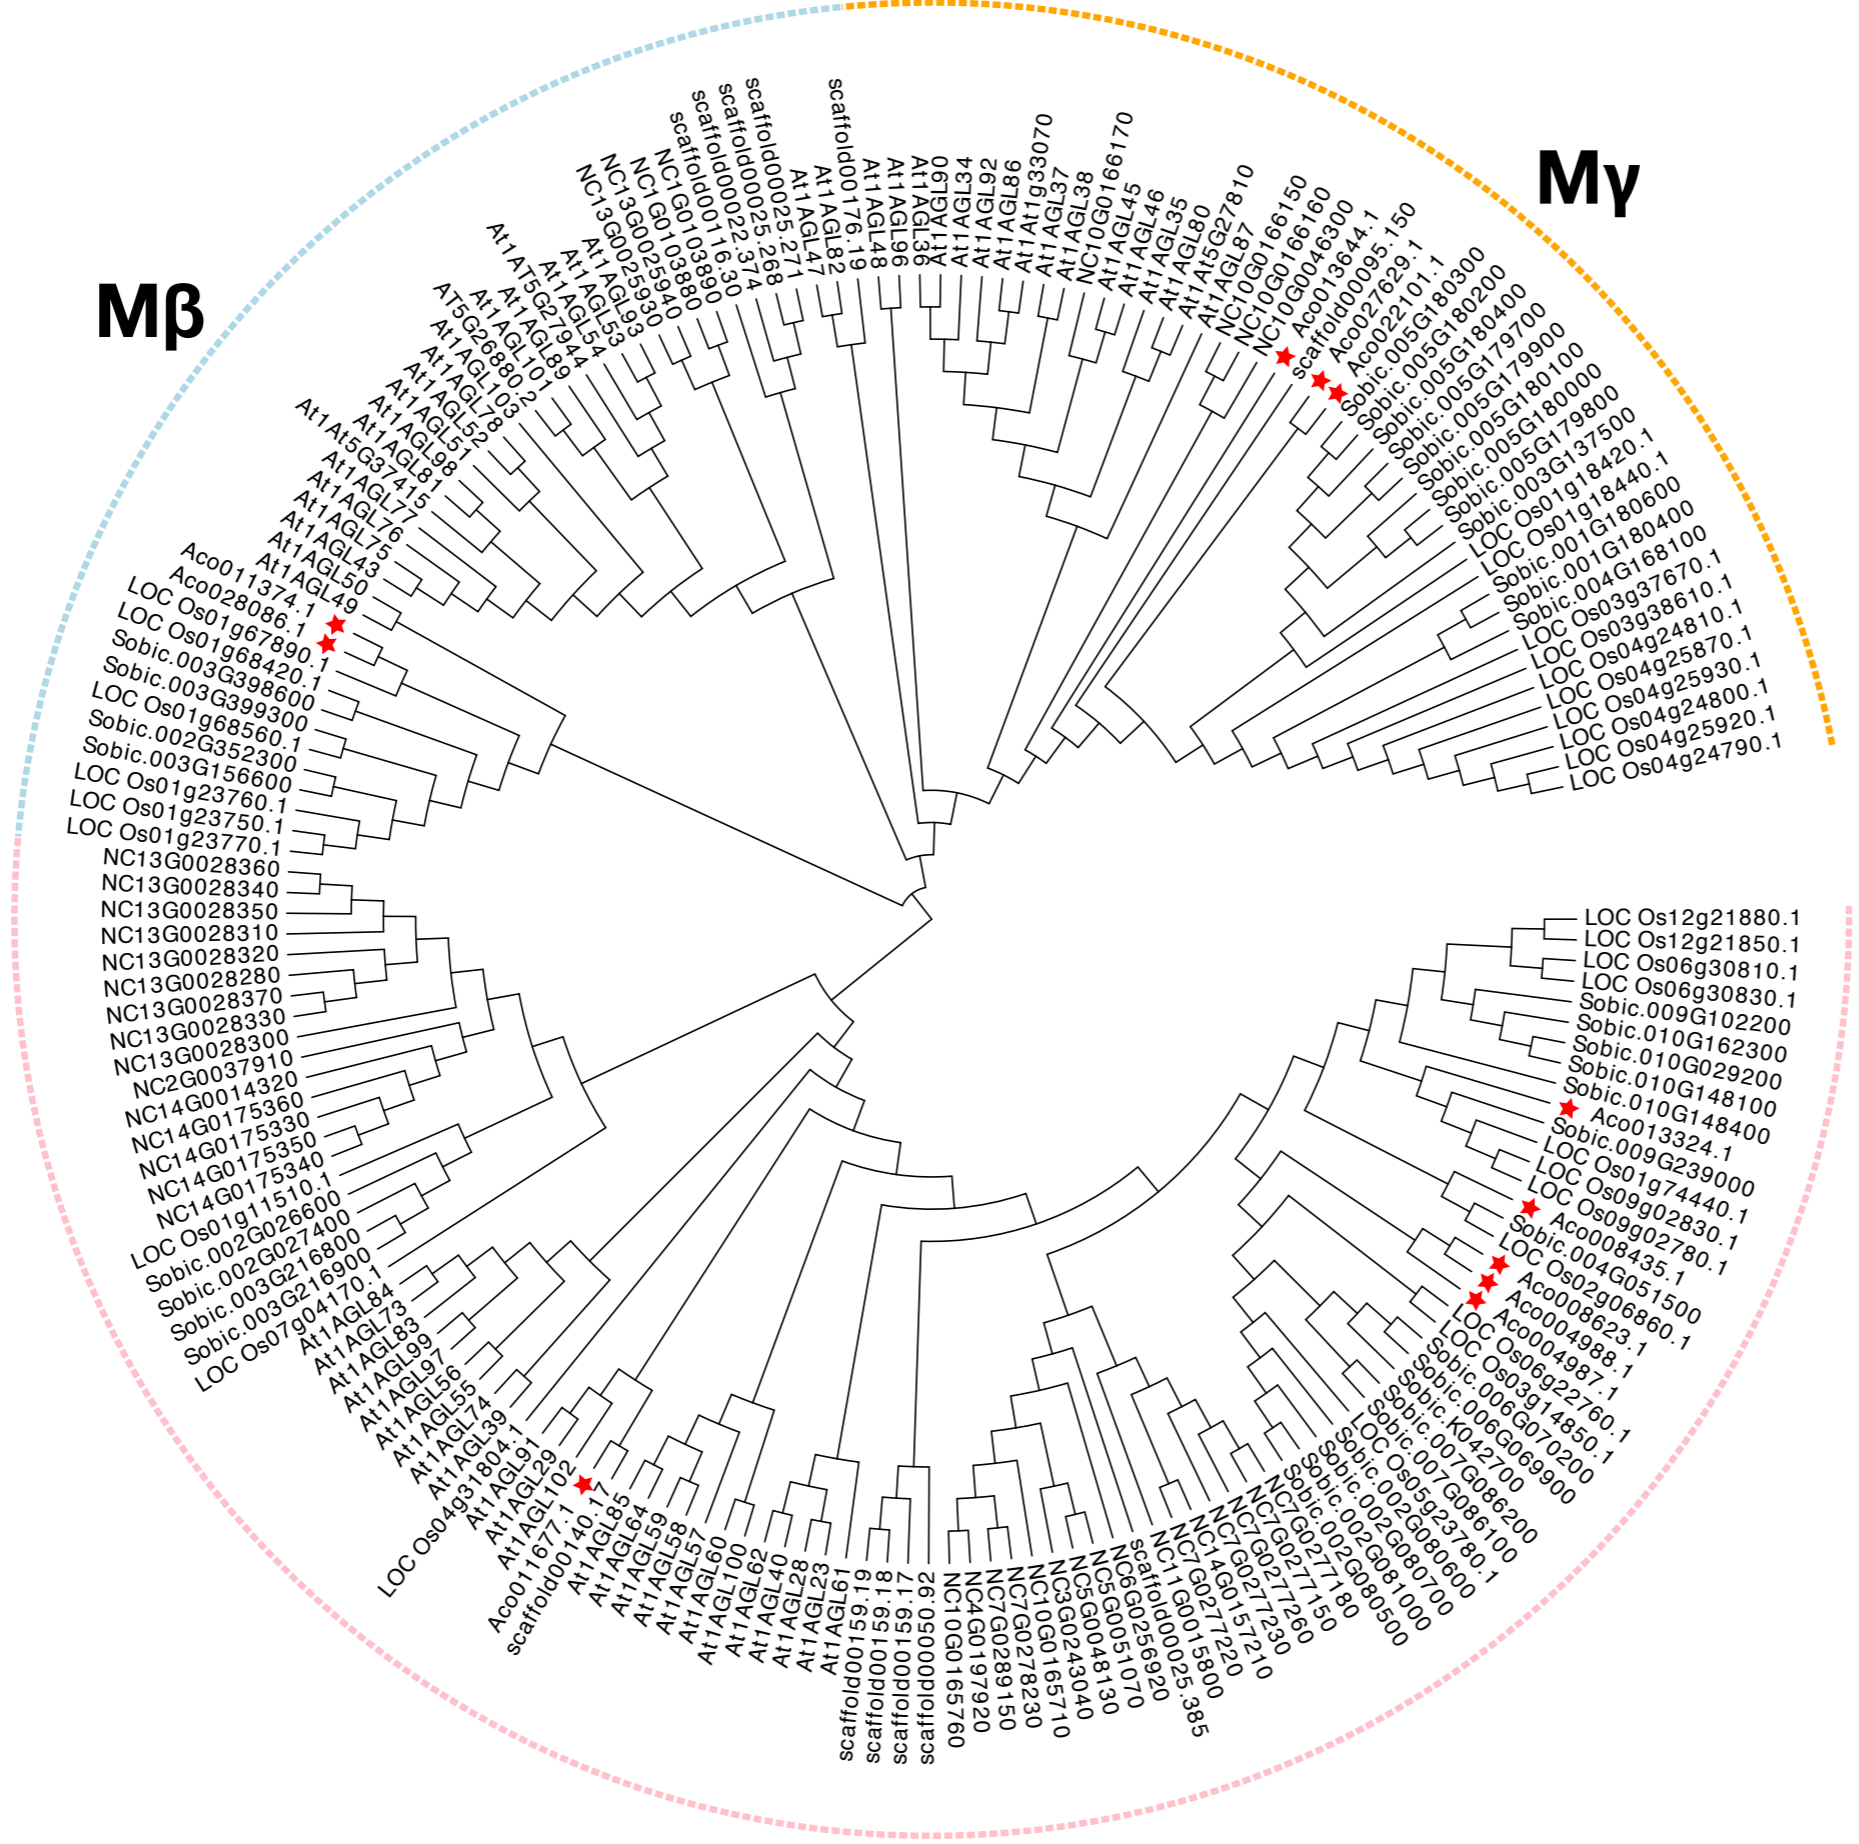

**M $\beta$**

**My**

**Ma**

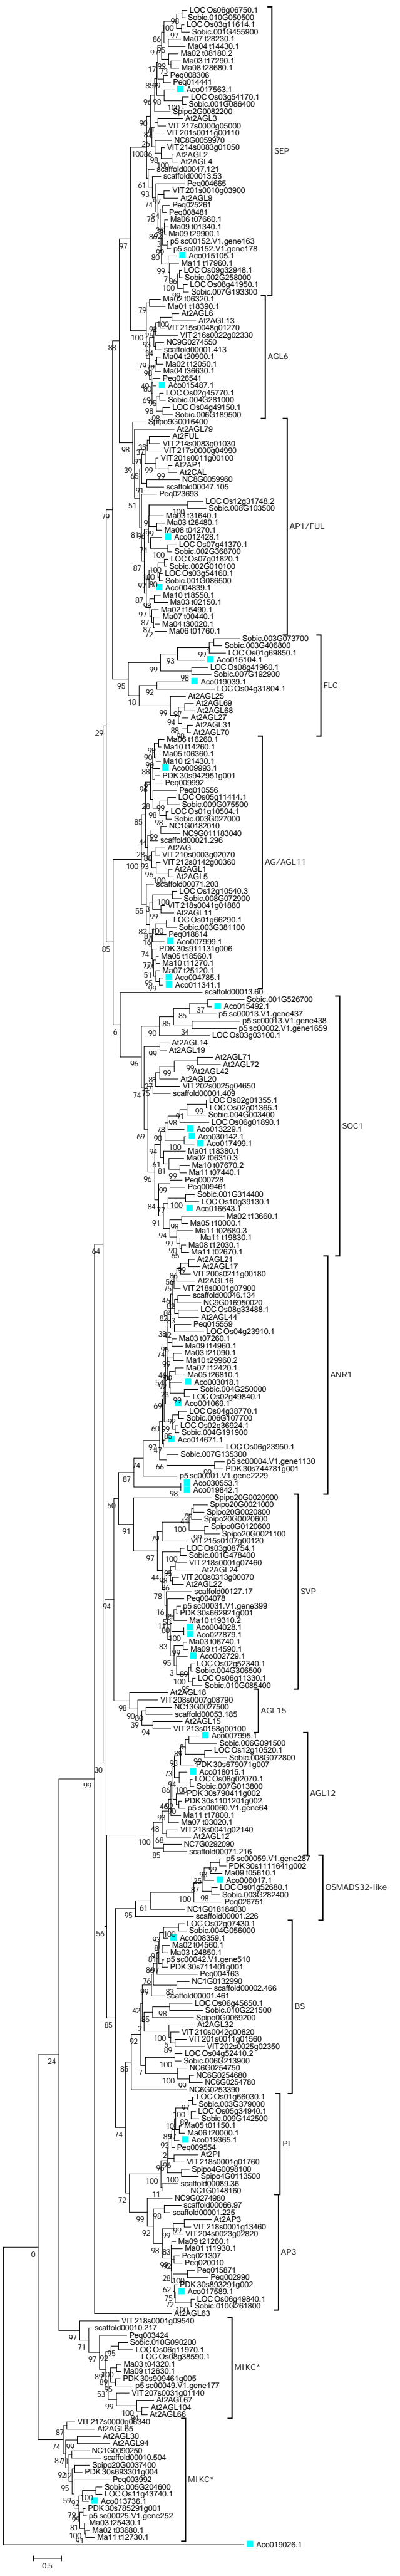

0.5

Aco019026.1

**Table S1. List of the other MADS-box genes in pineapple besides Table 1.**

| <b>Subfamily</b> | <b>Gene Name</b> | <b>Gene ID</b> | <b>Chromosome location</b> |                   |
|------------------|------------------|----------------|----------------------------|-------------------|
| SOC1             | AcSOC1a          | Aco013229.1    | LG24                       | 734598-748716     |
|                  | AcSOC1b          | Aco016643.1    | LG08                       | 10668008-10681245 |
|                  | AcSOC1c          | Aco015492.1    | LG03                       | 12918841-12919719 |
|                  | AcSOC1d          | Aco030142.1    | LG22                       | 1009597-1024390   |
|                  | AcSOC1e          | Aco017499.1    | LG22                       | 1357314-1364201   |
| SVP              | AcSVP1           | Aco002729.1    | LG06                       | 11053591-11061483 |
|                  | AcSVP2           | Aco004028.1    | LG15                       | 1900301-1908029   |
|                  | AcSVP3           | Aco027879.1    | scaffold_1163              | 8888-16651        |
| ANR1             | AcANR1a          | Aco003018.1    | LG06                       | 13262206-13272758 |
|                  | AcANR1b          | Aco001069.1    | LG02                       | 14452429-14467956 |
|                  | AcANR1c          | Aco014671.1    | LG20                       | 9897052-9905261   |
|                  | AcANR1d          | Aco019842.1    | LG15                       | 9145194-9148873   |
|                  | AcANR1e          | Aco030553.1    | scaffold_1319              | 33959-4138        |
| AGL12            | AcAGL12a         | Aco007995.1    | LG21                       | 8966391-8969977   |
|                  | AcAGL12b         | Aco018015.1    | LG01                       | 20412367-20420233 |
| FLC              | AcFLC1           | Aco015104.1    | LG01                       | 24318710-24340976 |
|                  | AcFLC2           | Aco019039.1    | LG20                       | 404283-409016     |
| OsMADS32- like   | AcMADS9          | Aco006017.1    | LG16                       | 9688836-9690655   |
| MIKC*            | AcMADS23         | Aco013736.1    | LG13                       | 10739290-10744427 |
|                  | AcMADS34         | Aco019026.1    | LG02                       | 11042145-11045945 |
|                  | AcMADS7          | Aco004987.1    | LG07                       | 1255014-1255685   |
|                  | AcMADS8          | Aco004988.1    | LG07                       | 1256809-1258119   |
| M $\alpha$       | AcMADS13         | Aco008435.1    | LG19                       | 10342859-10343854 |
|                  | AcMADS14         | Aco008623.1    | LG09                       | 1164861-1165547   |
|                  | AcMADS18         | Aco011677.1    | LG08                       | 12300067-12300639 |
| M $\beta$        | AcMADS21         | Aco013324.1    | LG15                       | 11241110-11241826 |
|                  | AcMADS17         | Aco011374.1    | LG01                       | 12049800-12051479 |
|                  | AcMADS42         | Aco028086.1    | scaffold_1517              | 21796-23778       |
| M $\gamma$       | AcMADS22         | Aco013644.1    | LG13                       | 11508561-11509322 |
|                  | AcMADS38         | Aco022101.1    | LG04                       | 74921-75724       |
|                  | AcMADS40         | Aco027629.1    | scaffold_622               | 55034-83846       |





Table S4. List of TPM value of ABCDE model genes in four representative pineapple floral parts (sepal (S1-S3), petal, stamen, pistil, and ovule (S1-S3)) at different developmental stages

|          | Sepal_1    | Sepal_2    | Sepal_3    | Petal      | Stamen     | Pistil     | Ovule_1     | Ovule_2    | Ovule_3    |
|----------|------------|------------|------------|------------|------------|------------|-------------|------------|------------|
| AcAG     | 8.186211   | 12.076561  | 2.188171   | 1.297335   | 611.396606 | 286.068909 | 375.707733  | 233.428802 | 344.144257 |
| AcAGL11a | 1.416363   | 0.540011   | 0          | 0          | 0.950804   | 21.792984  | 805.119629  | 99.889046  | 114.208054 |
| AcAGL11c | 2.409096   | 0.402182   | 0.279012   | 0          | 14.997993  | 2.780759   | 1100.841675 | 451.746185 | 322.414276 |
| AcFUL1   | 251.734436 | 173.947632 | 120.215485 | 15.662314  | 44.306515  | 58.44532   | 67.74942    | 84.912529  | 227.507721 |
| AcFUL2   | 1.917681   | 0.500571   | 0.195296   | 13.225686  | 3.531693   | 8.983928   | 0.789622    | 0.165155   | 0.131564   |
| AcAP3    | 3.112243   | 0.103706   | 0          | 186.941849 | 144.678467 | 108.90638  | 2.941939    | 0.293431   | 0.314709   |
| AcBS     | 6.311272   | 0          | 0          | 0          | 10.021465  | 1.446927   | 334.144775  | 44.373417  | 0          |
| AcPI     | 26.064533  | 15.140951  | 7.544228   | 365.454742 | 410.719208 | 427.315033 | 51.612328   | 42.9762    | 25.628199  |
| AcAGL6   | 421.982666 | 315.277252 | 521.918335 | 398.259949 | 22.199963  | 9.666361   | 93.956963   | 91.479332  | 85.477829  |
| AcSEP3   | 90.44912   | 109.871208 | 102.1101   | 196.484879 | 198.697067 | 224.710999 | 320.52475   | 650.797058 | 324.481049 |
| AcSEP1   | 75.556793  | 102.724907 | 100.392685 | 49.037189  | 15.341432  | 53.247494  | 31.081751   | 36.270744  | 37.980759  |
| AcAGL11b | 0.316978   | 0          | 0          | 0          | 16.102308  | 111.411087 | 68.176971   | 17.927546  | 13.215206  |



Table S5. Primers used in this study

| Gene ID     | Primer Label | Sequence 5'-3'           |
|-------------|--------------|--------------------------|
| Aco015105.1 | Aco1-A_F     | CAAAGTAGCTGCCAAGAGTACA   |
| Aco015105.1 | Aco1-A_R     | CTTGATGCTAAGTGTTCCCAAATC |
| Aco017589.1 | Aco2-A_F     | GGTTGTTTCGTCACAGGAAGTA   |
| Aco017589.1 | Aco2-A_R     | CATAGACTGGGTGCTCTTCTTT   |
| Aco012428.1 | Aco3-A_F     | GTGAGGACTATGGGAAGCTAAAG  |
| Aco012428.1 | Aco3-A_R     | GTTGTTGCTCCAGTTGTTGAAG   |
| Aco009993.1 | Aco4-B_F     | TCGAAATCAAGAGGATCGAGAAC  |
| Aco009993.1 | Aco4-B_R     | GCGGCTGGAGAAGACAATTA     |
| Aco004839.1 | Aco5-A_F     | CCCTCATTATCTTCTCCACCAAG  |
| Aco004839.1 | Aco5-A_R     | GCATAGGAGTAGCGCTCATAAC   |
| Aco019365.1 | Aco6-A_F     | AGGAGCTGATCCCGATAGAA     |
| Aco019365.1 | Aco6-A_R     | GTTCTCCTCCTCCAACAATCTC   |
| Aco015487.1 | Aco7-A_F     | CCCACTCTGCAAATAGGGTATC   |
| Aco015487.1 | Aco7-A_R     | ACCCAACCAAGCATGAAATTG    |
| Aco017563.1 | Aco8-A_F     | CCACTGAGACACAGAGCAATTA   |
| Aco017563.1 | Aco8-A_R     | TGGAATCAAATCCTCACCAAGA   |
